# Supplementary material for: A fluorogenic and chromogenic dual sensor for the detection of cyanide and copper(ii) in water samples and living cells
Source: Royal Society of Chemistry journal article supplement (doi:10.1039/c6ay01902a), 2016-01-01

## FLUOROGENIC AND CHROMOGENIC DUAL SENSOR FOR THE DETECTION OF CYANIDE AND COPPER (II) IN WATER SAMPLE AND LIVING CELLS

Thankarajan Mini Mablet Ebaston<sup>a</sup>, Gopal Balamurugan <sup>a</sup>, Sivan Velmathi<sup>\*a</sup>

<sup>a</sup> Department of Chemistry, Organic and Polymer Synthesis Laboratory, National  
Institute of Technology, Tiruchirappalli-620 015, INDIA. Tel: 91-431-2503640; e-mail:

velmathis@nitt.edu

### SUPPORTING INFORMATION

#### LIST OF FIGURES

**Figure S1.** FT-IR spectrum of sensor R

**Figure S2.** <sup>1</sup>H NMR spectrum of sensor R (300 MHz, CDCl<sub>3</sub>)

**Figure S3.** <sup>13</sup>C NMR (75 MHz, CDCl<sub>3</sub>)

**Figure S4.** EI Mass spectrum of R (Mol. Wt = 278)

**Figure S5.** UV-vis spectrum of R (1 x 10<sup>-5</sup> M, in CH<sub>3</sub>CN) upon titration (0-2 eq.) with aqueous solution of CN<sup>-</sup> ions (1.5 x 10<sup>-3</sup> M, in H<sub>2</sub>O).

**Figure S6.** Effect of pH towards the sensing behaviour of R (5 x 10<sup>-5</sup> M, in HEPES Buffer using ACN: H<sub>2</sub>O 3:7) upon addition of 2 eq. with CN<sup>-</sup> ions (1.5 x 10<sup>-3</sup> M, in H<sub>2</sub>O).

**Figure S7.** Rate constant determination using Integrated Rate Laws.

**Figure S8.** Fluorescence spectrum of sensor R (1 x 10<sup>-5</sup> M, in CH<sub>3</sub>CN) upon titration (0 – 2 eq.) with aqueous solution of CN<sup>-</sup> (1.5 x 10<sup>-3</sup> M, in H<sub>2</sub>O)

**Figure S9.** Detection limit plot: Intensity versus concentration of cyanide.

**Figure S10.** Job's plot for sensor R

**Figure S1.** FT-IR spectrum of sensor R 3041 (Ar-H), 2220 (C- N), 1597 (C=C), 1583 (C=C), 822 (Ar-H)

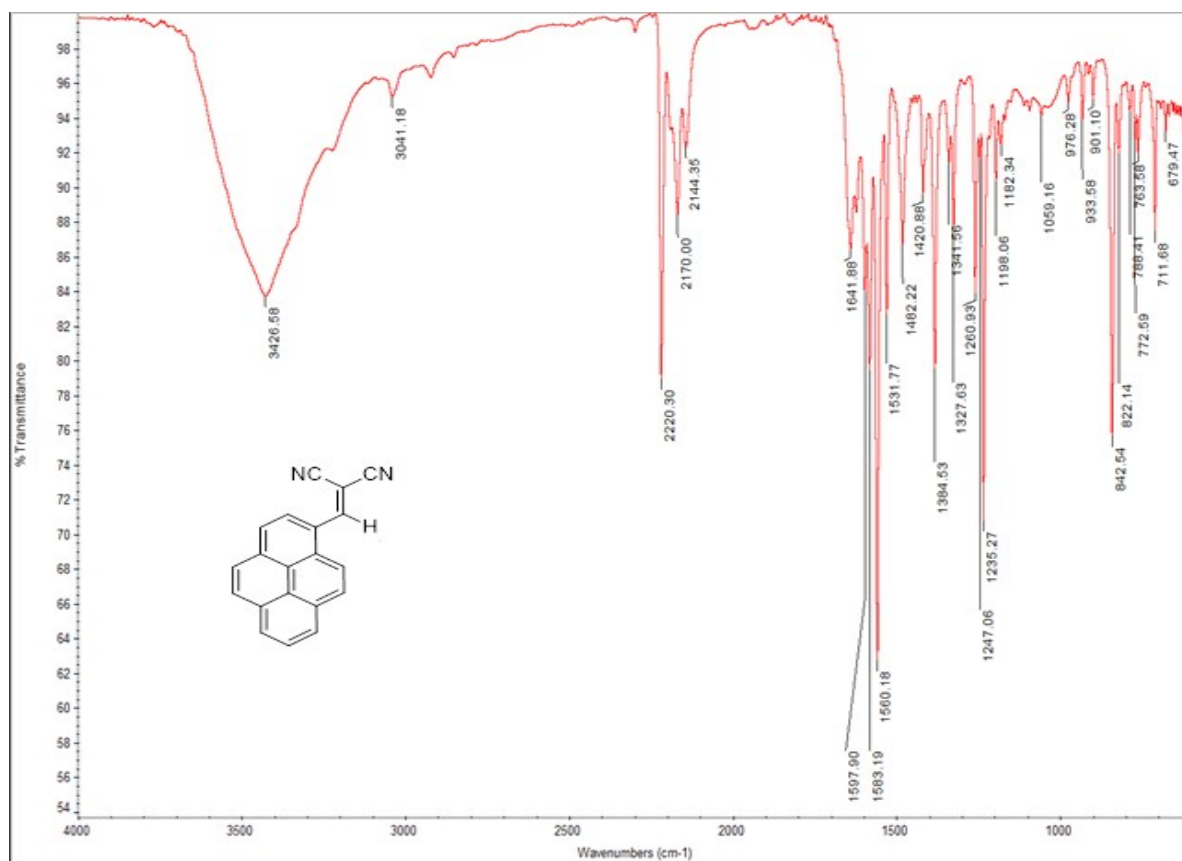

**Figure S2.** <sup>1</sup>H NMR spectrum of sensor R (300 MHz, CDCl<sub>3</sub>) δ (ppm): 8.93 (s, 1H, a'), 8.85 (d, 1H, b), 8.39-8.13 (m, 8H, aromatic)

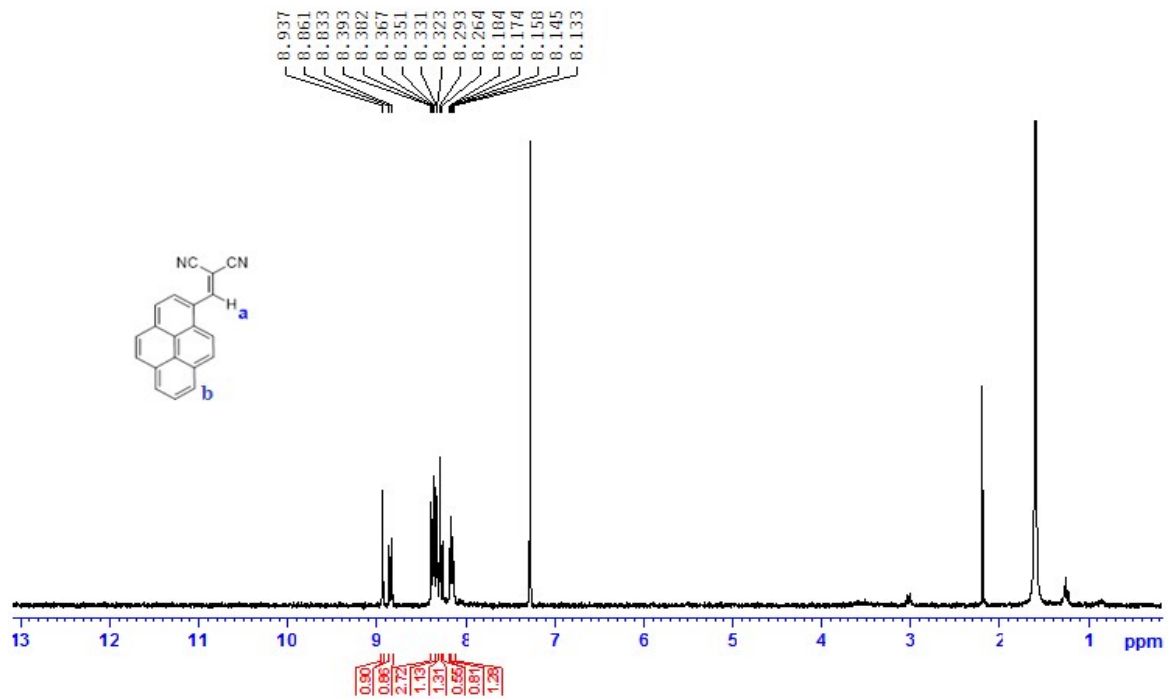

**Figure S3.**  $^{13}\text{C}$  NMR (75 MHz,  $\text{CDCl}_3$ )  $\delta$  (ppm) of sensor R: 156.49 (C 1), 121.13 (CN carbon), 135.83, 131.22, 131.07, 130.83, 130.31, 127.84, 127.54, 127.37, 127.05, 125.89, 125.23, 124.65, 124.10, 123.81 (aromatic carbons)

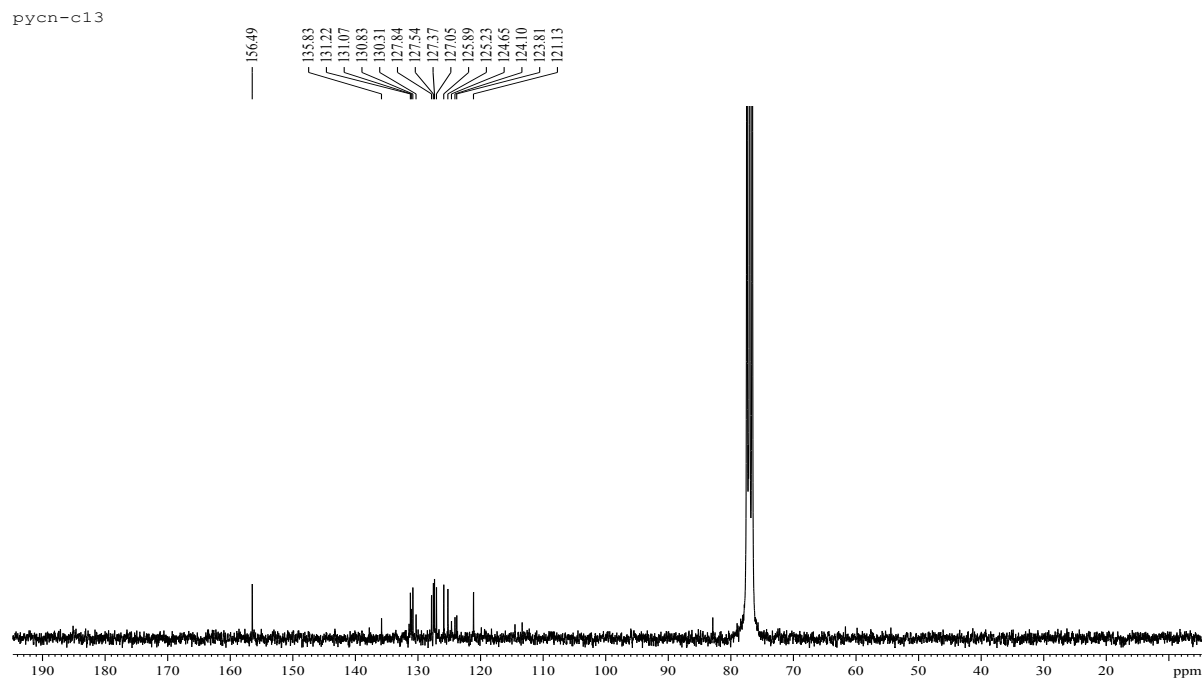

**Figure S4. EI Mass spectrum of R (Mol. Wt = 278)**

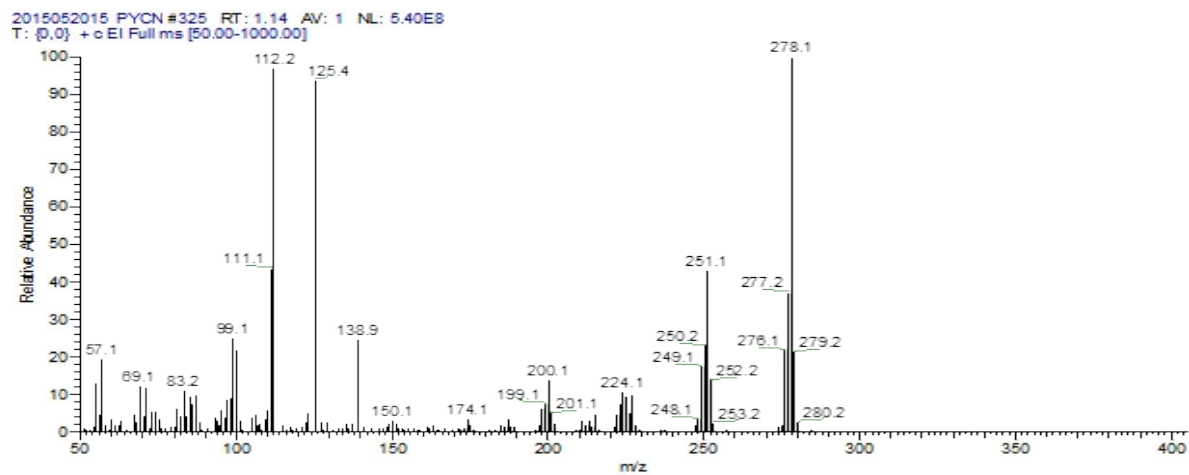

**Figure S5.** UV-vis spectrum of R ( $1 \times 10^{-5}$  M, in  $\text{CH}_3\text{CN}$ ) upon titration (0-2 eq.) with aqueous solution of  $\text{CN}^-$  ions ( $1.5 \times 10^{-3}$  M, in  $\text{H}_2\text{O}$ ).

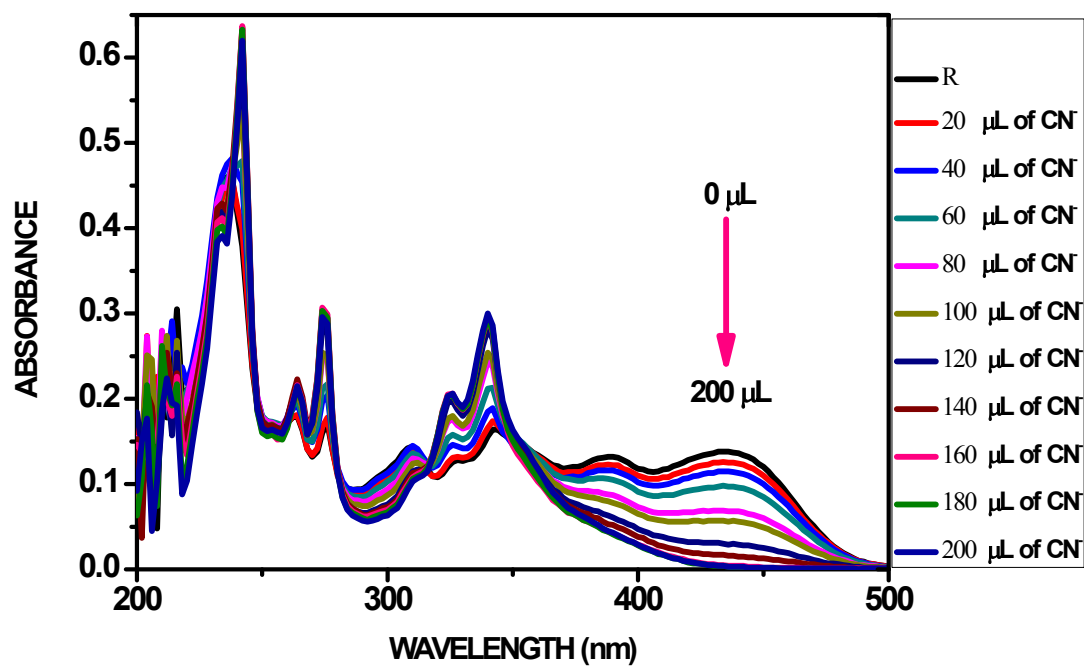

**Figure S6.** Effect of pH towards the sensing behaviour of R ( $5 \times 10^{-5}$  M, in HEPES Buffer using ACN: H<sub>2</sub>O 3:7) upon addition of 2 eq. with CN<sup>-</sup> ions ( $1.5 \times 10^{-3}$  M, in H<sub>2</sub>O).

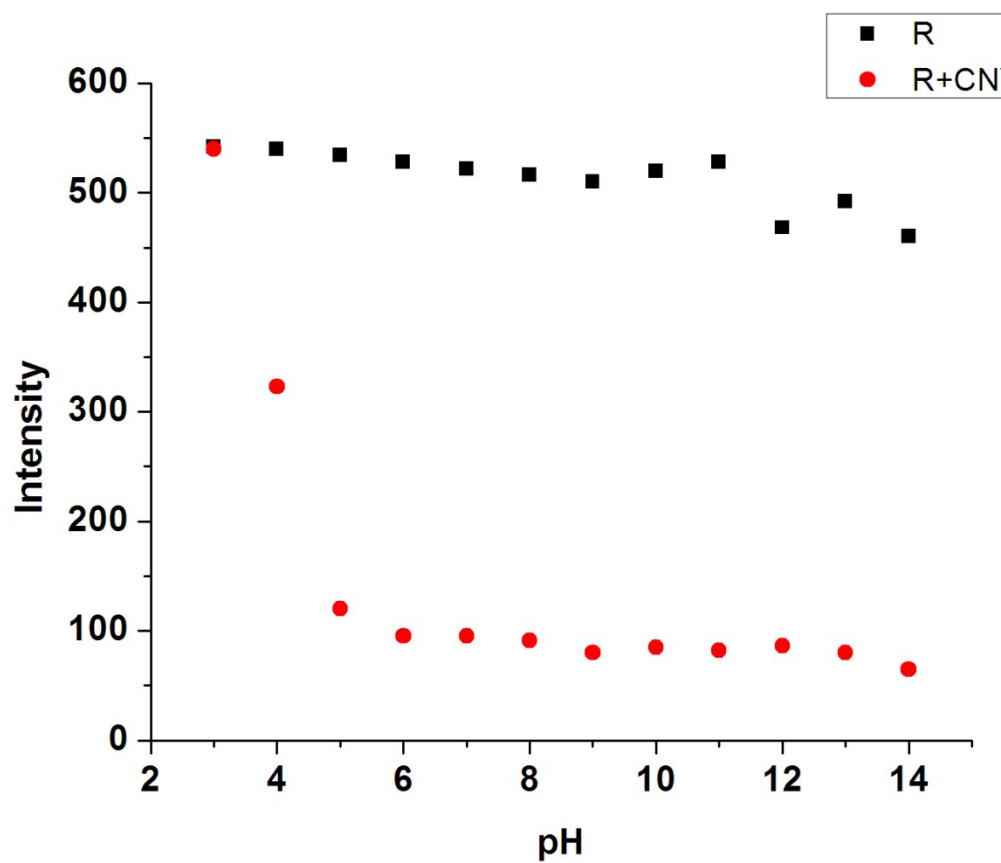

**Figure S7.** Rate constants determination using Integrated Rate Laws for Cyanide adduct formation (a) and Cu(II) complexation (b)

**a**

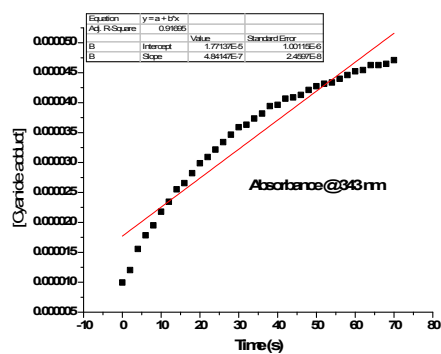

**b**

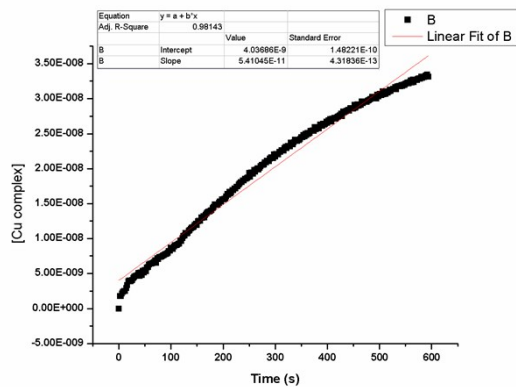



**Figure S8.** Fluorescence spectrum of sensor R ( $1 \times 10^{-5}$  M, in  $\text{CH}_3\text{CN}$ ) upon titration (0 – 2 eq.) with aqueous solution of  $\text{CN}^-$  ( $1.5 \times 10^{-3}$  M, in  $\text{H}_2\text{O}$ )

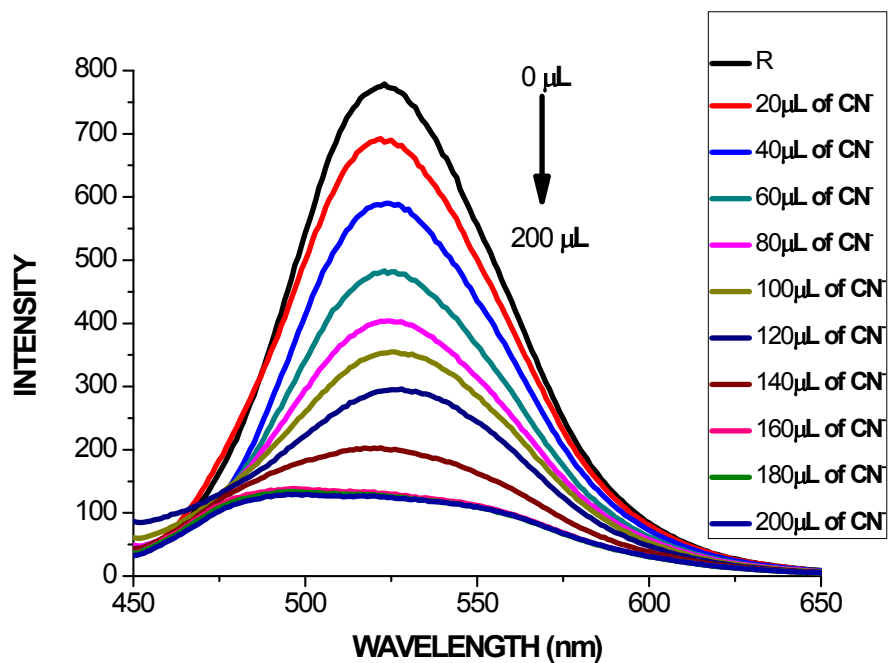

**Figure S9.** Detection limit plot: Intensity versus concentration of cyanide

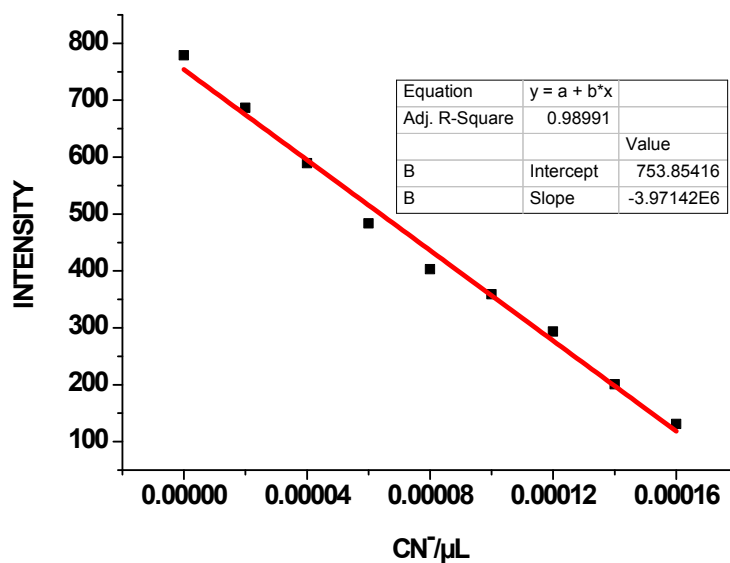

**Figure S10.** Job's plot for sensor R with cyanide

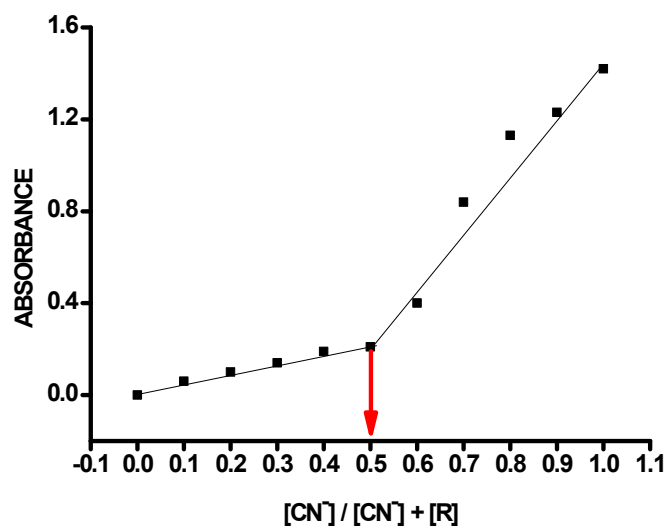

Supplement: c6ay01902a1.pdf [file c6ay01902a1.pdf]
